# Supplementary material for: Depression and Anxiety in Heart Transplant Recipients: Prevalence and Impact on Post-Transplant Outcomes
Source: J Pers Med. 2023 May 17;13(5):844. doi: 10.3390/jpm13050844 (PMC10220721; doi:10.3390/jpm13050844)
Supplement: Supplementary file 1 [file jpm-13-00844-s001.zip › jpm-2375688-supplementary.pdf]

## Supplementary Material

**Table S1.** Diagnoses and procedural codes.

| Diagnoses, Procedures<br>and Medical Treatment | Corresponding Codes                                                                                                                                                                |
|------------------------------------------------|------------------------------------------------------------------------------------------------------------------------------------------------------------------------------------|
| VAD                                            | 5-376.20, 5-376.22, 5-376.23, 5-376.30, 5-376.33, 5-376.34, 5-376.40, 5-376.50, 5-376.60, 5-376.70, 5-376.72, 5-376.80, 5-376.83, 5-376.84, 5-376.90, 5-376.91, 5-376.92, 5-376.93 |
| Acute myocarditis                              | I40, I41, I51.4                                                                                                                                                                    |
| Dilated cardiomyopathy                         | I42.0                                                                                                                                                                              |
| Non-dilated cardiomyopathy                     | I42.1, I42.2, I42.3, I42.4, I42.5, I42.6, I42.7, I42.8, I42.9, I43.0, I43.1, I43.2, I43.8                                                                                          |
| Ischemic heart disease                         | I25                                                                                                                                                                                |
| Hypertension                                   | I10 – I15                                                                                                                                                                          |
| Diabetes mellitus                              | E10 – E14                                                                                                                                                                          |
| Dyslipidemia                                   | E78                                                                                                                                                                                |
| Obesity                                        | E66                                                                                                                                                                                |
| Smoking                                        | F17                                                                                                                                                                                |
| Atrial flutter/fibrillation                    | I48                                                                                                                                                                                |
| PAD                                            | I70.20, I70.21, I72.22, I72.23, I72.24, I72.25, I72.29                                                                                                                             |
| CVD                                            | I67.2                                                                                                                                                                              |
| Chronic kidney disease                         | N18, N19                                                                                                                                                                           |
| Cancer                                         | C                                                                                                                                                                                  |
| Previous listing                               | 1-920.01, 1-920.21, 1-920.31, U55.10, U55.11, U55.12                                                                                                                               |
| Previous myocardial infarction                 | I21, I22                                                                                                                                                                           |
| Previous PCI                                   | 8-837                                                                                                                                                                              |

|                          |                                    |
|--------------------------|------------------------------------|
| Previous Stroke          | I60 - I64, I69                     |
| PAI                      | B01AC04, B01AC06, B01AC22, B01AC24 |
| OAC                      | B01AF01 - B01AF04, B01AA04         |
| ACE-I or AT1-antagonists | C01AA, C09C                        |
| Statins                  | C10AA01 – C10AA08                  |
| Betablocker              | C07                                |

Diagnoses were coded according to the German Modification of the International Statistical Classification of Diseases and Related Health Problems 10th Revision (ICD-10-GM). Procedures were coded according to the German Procedure Classification (OPS). Anatomical Therapeutic Chemical codes (ATC-codes) were used for the prescribed medication.

**Abbreviations:** DA – depression and anxiety, VAD – ventricular assist device, PAD – peripheral artery disease, CVD – cerebrovascular disease, PCI - percutaneous coronary intervention, PAI - platelet aggregation inhibitor, OAC – oral anticoagulants, ACE-I - angiotensin-converting enzyme inhibitors, AT1-antagonists – angiotensin 1 receptor antagonists

**Table S2.** Diagnoses and procedural codes.

| <b>Diagnoses, Procedures<br/>and Medication</b> | <b>Corresponding Codes</b>             |
|-------------------------------------------------|----------------------------------------|
| ECMO                                            | 8-852.3                                |
| Acute renal failure                             | N17                                    |
| Renal replacement therapy                       | 8-853 – 8-855, 8-857                   |
| Ischemic stroke                                 | I63, I64                               |
| Haemorrhagic stroke                             | I60 – I62                              |
| Bleeding                                        | K92, H44.8, T81.0, T81.2, T81.3, T81.7 |
| Ventilation                                     | 8-713                                  |
| In-hospital CPR                                 | 8-771                                  |
| Blood transfusion                               | 8-800.C                                |
| Septicaemia                                     | A41                                    |
| Allograft rejection                             | T86.2                                  |
| Depression                                      | F30 – F39                              |
| Anxiety                                         | F41                                    |

Diagnoses were coded according to the German Modification of the International Statistical Classification of Diseases and Related Health Problems 10th Revision (ICD-10-GM). Procedures were coded according to the German Procedure Classification (OPS). Anatomical Therapeutic Chemical codes (ATC-codes) were used for the prescribed medication.

**Abbreviations:** ECMO - extracorporeal membrane oxygenation, CPR - cardiopulmonary resuscitation.

**Table S3.** In-hospital mortality during index hospitalisation for heart transplantation.

| <b>In-Hospital Mortality</b> |              |                         |         |
|------------------------------|--------------|-------------------------|---------|
| Variables                    | Hazard ratio | 95% confidence interval | p value |
| Depression and anxiety       | 1.17         | 0.75 – 1.82             | 0.48    |
| Female gender                | 1.82         | 1.12 – 2.93             | 0.02    |
| LVAD prior to HTx            | 1.45         | 0.90 – 2.30             | 0.12    |
| ECMO prior to HTx            | 5.59         | 3.41 – 9.01             | 1.10    |
| Age per year                 | 1.02         | 1.00 – 1.04             | 0.07    |
| Diabetes mellitus            | 0.67         | 0.42 – 1.10             | 0.10    |
| Previous MI                  | 1.10         | 0.64 – 1.79             | 0.79    |
| Previous stroke              | 0.77         | 0.41 – 1.38             | 0.40    |
| PAD                          | 1.10         | 0.50 – 2.29             | 0.80    |
| Cerebrovascular disease      | 1.04         | 0.50 – 2.10             | 0.90    |
| Chronic kidney disease       | 1.25         | 0.77 – 2.10             | 0.37    |
| Previous acute myocarditis   | 0.84         | 0.42 – 1.60             | 0.60    |
| Dilated cardiomyopathy       | 0.44         | 0.26 – 0.77             | 0.004   |
| Non-dilated cardiomyopathy   | 0.44         | 0.18 – 0.97             | 0.05    |
| Ischemic heart disease       | 1.03         | 0.60 – 1.76             | 0.93    |

HTx – heart transplantation, LVAD – left ventricular assist device, ECMO - Extracorporeal Membrane Oxygenation, MI – myocardial infarction, PAD – peripheral artery disease
